# Supplementary material for: Comparison of multiple genotyping methods for the identification of the cancer predisposing founder mutation p.R337H inTP53
Source: PubMed Central journal article supplement (PMC4910550; doi:10.1590/1678-4685-gmb-2014-0351), 2016-06-03
Supplement: 1415-4757-gmb-1678-4685-GMB-2014-0351-Suppl01.pdf [file 1415-4757-gmb-1678-4685-GMB-2014-0351-Suppl01.pdf]

**Table S1 - Costs of *TP53*-p.R337H genotyping for 100 patients according to expected mutation prevalence.**

| Method                                      | Costs in different mutation prevalence scenarios (R\$) |                 |                 |                 |
|---------------------------------------------|--------------------------------------------------------|-----------------|-----------------|-----------------|
|                                             | 0.3%                                                   | 2.5 %           | 18.1%           | 83.7%           |
| DNA Sequencing                              | 5,329.00                                               | 5,329.00        | 5,329.00        | <b>5,329.00</b> |
| PCR-RFLP                                    | 1,986.00                                               | <b>1,986.00</b> | 1,986.00        | 1,986.00        |
| TaqMan-PCR                                  | 2,628.00                                               | 2,628.00        | <b>2,628.00</b> | 2,628.00        |
| HRM followed by DNA sequencing <sup>a</sup> | <b>1,896.35</b>                                        | <b>1,986.92</b> | <b>2,629.17</b> | <b>5,329.92</b> |

<sup>a</sup> sequencing from same DNA sample (no new DNA extraction) - cost of R\$ 41.17 for patient
