# Supplementary material for: Comparison of multiple genotyping methods for the identification of the cancer predisposing founder mutation p.R337H inTP53
Source: PubMed Central journal article supplement (PMC4910550; doi:10.1590/1678-4685-gmb-2014-0351), 2016-06-03
Supplement: 1415-4757-gmb-1678-4685-GMB-2014-0351-Suppl02.pdf [file 1415-4757-gmb-1678-4685-GMB-2014-0351-Suppl02.pdf]

(A)

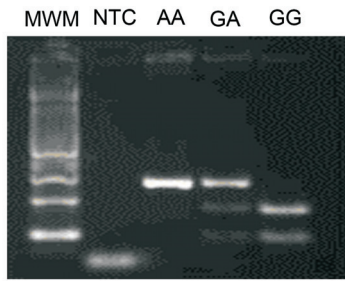

(B)

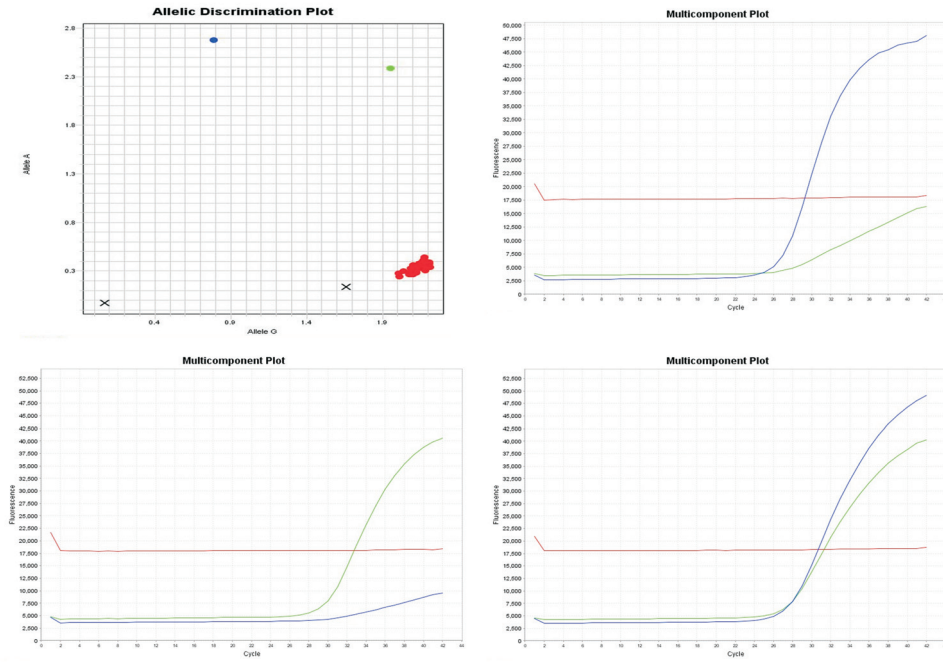

(C)

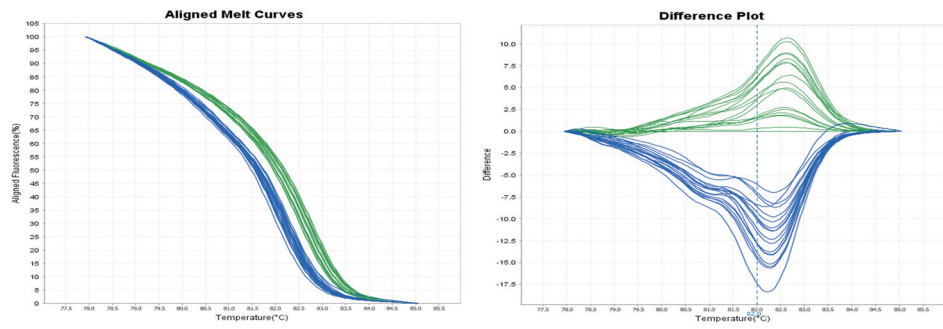

(D)

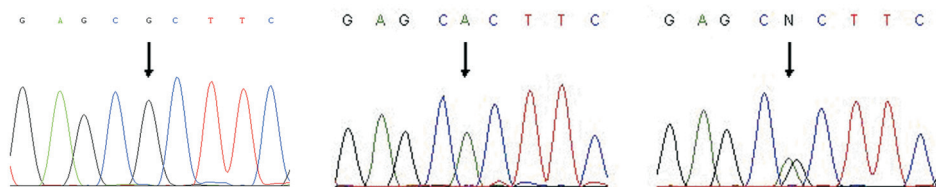

Figure S1 - Results obtained with the different genotyping methodologies
